# Supplementary material
Source: publisher site journal article supplement (https://www.degruyterbrill.com/publication/journal_key/JCCALL/downloadAsset/JCCALL_JCCALL_sample_title_page.docx)
Supplement: Supplementary file 1 [file JCCALL_JCCALL_sample_title_page.docx]

*Journal of China Computer-Assisted Language Learning*

Sample Title Page
Authors: Author 1, Author 2, Author 3, and Author 4
Corresponding author: full name
Corresponding author’s affiliation: university, country
Institutional address: department, university, street, number, postal/zip code, city,
country
Email: email
Full title of article:
Short title of the Article (for running head):
Word count (all inclusive):
Character count (with spaces):

Sample Bionote(s)
FULL NAME received his/her PhD in AREA from UNIVERSITY and is currently TITLE at
UNIVERSITY. His/Her research interests include RESEARCH INTERESTS. His/Her most
recent book-length publication is TITLE (YEAR, PUBLISHER). Address for
correspondence: DEPARTMENT, UNIVERSITY, STREET, NUMBER, POSTAL/ZIP CODE,
CITY, COUNTRY. Email: [xxxxx@xxxxx.xx](mailto:xxxxx@xxxxx.xx)

**Note:** If the manuscript has two or more authors, please provide the bionote of each author as the above sample bionote, including short introduction, address for correspondence, and email.
